# Supplementary material for: A New Strategy Involving the Use of Peptides and Graphene Oxide for Fluorescence Turn-on Detection of Proteins
Source: MDPI journal article supplement (doi:10.3390/s18020385), 2018-01-29

## **Supplementary Information**

### **A New Strategy Involving the Use of Peptides and Graphene Oxide for Fluorescence Turn-on Detection of Proteins**

Huan Shi<sup>a,b, ‡</sup>, Bibo Zhang<sup>a,b, ‡</sup>, Shuwen Liu<sup>a,b</sup>, Chunyan Tan<sup>a,b</sup>, Ying Tan<sup>a,b,\*</sup>, Yuyang Jiang<sup>b,c</sup>

a Department of Chemistry, Tsinghua University, Beijing 100084, P. R. China

b The State Key Laboratory Breeding Base-Shenzhen Key Laboratory of Chemical Biology, the Graduate School at Shenzhen, Tsinghua University, Shenzhen 518055, P. R. China.

c School of Pharmaceutical Sciences, Tsinghua University, Beijing 100084, P. R. China

‡ These authors contributed equally to this work.

\* Correspondence: [tan.ying@sz.tsinghua.edu.cn](mailto:tan.ying@sz.tsinghua.edu.cn); Tel.: +86-0755-26036533

**Table S1. Peptide probe sequences binding with Bcl-xL in the design.**

| No.          | Sequence                                   |
|--------------|--------------------------------------------|
| TAM-PEP (R4) | TAM- <u>RRRR</u> NLWAAQRYGRELRRMSDKFVD     |
| TAM-PEP (R6) | TAM- <u>RRRRRR</u> NLWAAQRYGRELRRMSDKFVD   |
| TAM-PEP (R8) | TAM- <u>RRRRRRRR</u> NLWAAQRYGRELRRMSDKFVD |

## Figure Legends

**Fig. S1** The Fluorescence intensity changes of GO-based aptasensor in the presence (red) and in the absence (black) of 5  $\mu\text{M}$  Bcl-xL with the increasing amount of GO in the 2% serum. The inset is the recovery ratio of the fluorescence intensity of TAM-PEP (R8) at the emission of 580 nm with different GO concentration, where F is the fluorescence intensity with Bcl-xL (5  $\mu\text{M}$ ), F<sub>0</sub> is the fluorescence intensity without Bcl-xL (5  $\mu\text{M}$ ). Experiment conditions: TAM-PEP (R8) 100 nM; Incubation time: 1 h; Room temperature. Excitation: 540 nm.

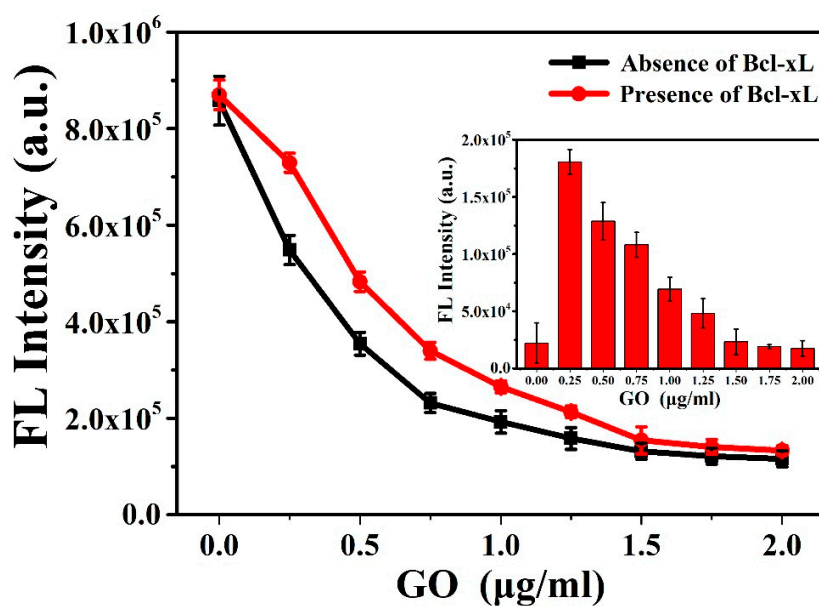

**Fig. S2** Cytotoxicity induced by GO in Hela cells

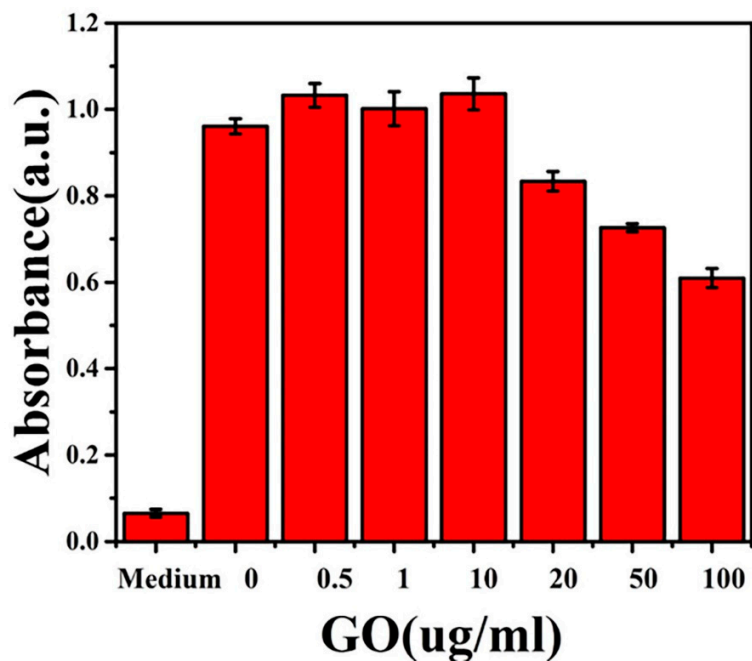

**Fig. S3** (a) Fluorescence images of TAM-PEP (R8) in Hela cells. (b) Fluorescence images of TAM-PEP (R8)/GO mixture in Hela cells. GO:  $5 \mu\text{g mL}^{-1}$  (c) Fluorescence images of TAM-PEP (R8)/GO mixture in Hela cells. GO:  $10 \mu\text{g mL}^{-1}$  Experiment conditions: TAM-R8-PEP:  $1 \mu\text{M}$ ; Excitation: 540 nm.

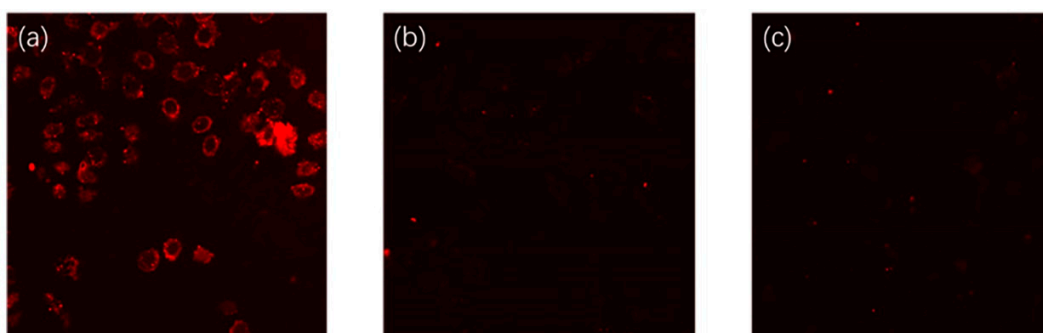

**Fig. S4** Western blotting determination and quantification of proteins expression in untransfected Hela cells (A) and transfected Hela cells (B)

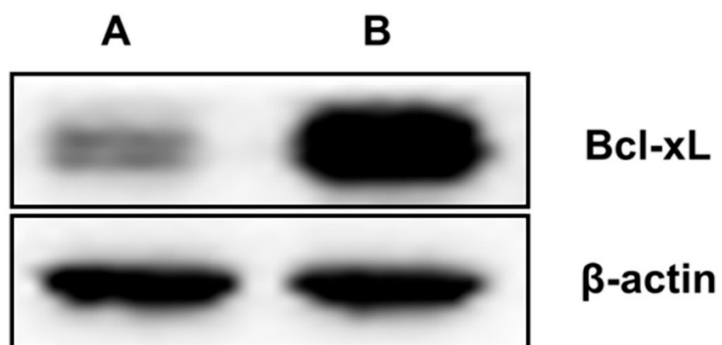

Supplement: s1 [file s1]
